# Supplementary material for: An ultrasensitive photo-driven self-powered aptasensor for microcystin-RR assay based on ZnIn2S4/Ti3C2 MXenes integrated with a matching capacitor for multiple signal amplification
Source: Royal Society of Chemistry journal article supplement (doi:10.1039/d3an00914a), 2023-01-01
Supplement: d3an00914a1.pdf [file d3an00914a1.pdf]

## Electronic Supplementary Information

### **Ultrasensitive photo-driven self-powered aptasensor for microcystin-RR assay based on ZnIn<sub>2</sub>S<sub>4</sub>/Ti<sub>3</sub>C<sub>2</sub> MXene integrated with a matching capacitor for multiple signal amplification**

*Jun Sun,<sup>a,\*</sup> Rongquan Zhu,<sup>a</sup> Xiaojiao Du,<sup>a,b,\*</sup> Bing Zhang,<sup>b</sup> Min Zheng,<sup>a,b</sup> Xingyu Ji,<sup>a</sup>*

*Long Geng<sup>a</sup>*

*<sup>a</sup> School of Electrical and Information Engineering, Jiangsu University, Zhenjiang 212013, P. R. China*

*<sup>b</sup> School of Photoelectric Engineering, Changzhou Institute of Technology, Changzhou, Jiangsu, 213032, P. R. China*

---

\*Corresponding author.

E-mail address: duxj@czust.edu.cn (X.J. Du)

sun2000jun@ujjs.edu.cn (J. Sun)

## Contents.

|                                                                                                                                                                                                        |            |
|--------------------------------------------------------------------------------------------------------------------------------------------------------------------------------------------------------|------------|
| <b>The pretreatment of the real samples.....</b>                                                                                                                                                       | <b>S3</b>  |
| <b>The UV–Vis diffuse-reflectance spectra of ZnIn<sub>2</sub>S<sub>4</sub>, Ti<sub>3</sub>C<sub>2</sub> , and Ti<sub>3</sub>C<sub>2</sub>/ZnIn<sub>2</sub>S<sub>4</sub>.<br/>(Fig. S1).....</b>        | <b>S4</b>  |
| <b>The UV–Vis diffuse-reflectance spectra of apt, Ti<sub>3</sub>C<sub>2</sub>/ZnIn<sub>2</sub>S<sub>4</sub>, and<br/>apt/Ti<sub>3</sub>C<sub>2</sub>/ZnIn<sub>2</sub>S<sub>4</sub>. (Fig. S2).....</b> | <b>S5</b>  |
| <b>The zeta potential diagram of Ti<sub>3</sub>C<sub>2</sub>/ZnIn<sub>2</sub>S<sub>4</sub> (Fig. S3A) before and (Fig. S3B)<br/>after adding the MC-RR aptamer.....</b>                                | <b>S6</b>  |
| <b>The XPS pattern of ZnIn<sub>2</sub>S<sub>4</sub> and Ti<sub>3</sub>C<sub>2</sub>/ZnIn<sub>2</sub>S<sub>4</sub>, Zn 2p, In 3d, S 2p, Ti 2p, and C<br/>1s. (Fig. S4).....</b>                         | <b>S7</b>  |
| <b>The OCP curve of ZnIn<sub>2</sub>S<sub>4</sub>/FTO photoanode and Cu<sub>2</sub>O/FTO photocathode with<br/>or without photoirradiation. (Fig. S5).....</b>                                         | <b>S8</b>  |
| <b>Effect of pH values of PBS. (Fig. S6).....</b>                                                                                                                                                      | <b>S9</b>  |
| <b>The reproducibility of the developed aptasensor toward MC-RR. (Fig. S7)....</b>                                                                                                                     | <b>S10</b> |
| <b>Comparison of the proposed self-powered aptasensor for the detection of<br/>MC-RR with other methods. (Table S1).....</b>                                                                           | <b>S11</b> |

## The pretreatment of the real samples

Live fish samples were purchased from the market in Xinbei District, Changzhou City. The fish was put in 40 °C water, and dead about 5 min. Then the dead fish was placed on the anatomical disc and muscle tissue were taken for experiment use. Fish samples were pretreated before testing.<sup>1,2</sup> Specifically, fresh fish samples were thoroughly dissected to obtain muscle tissue samples, and the muscle tissue samples were homogenized with a masher to form meat paste samples. Next, 10 g (accurate to 0.01 g) of meat paste samples and anhydrous sodium sulfate (40 g) were placed in a mortar, and ground to a fine powder. The ground fine powder was placed in a stoppered erlenmeyer flask with cyclohexane solution (50 mL), and shook as well as filtered for 20 minutes. To purify the interfering factors such as fat in the real samples,<sup>3</sup> concentrated sulfuric acid (5 mL, 80 % by mass) was employed to sulfonation treatment until it was colorless and transparent. And then, to wash and neutralize the real samples solution, the organic phase was added with sodium sulfate solution (2 %, the mass percentage) to stand for separation, and the aqueous layer was removed. After that, the organic phase was dehydrated by anhydrous sodium sulfate (10 g) in a K-D concentrator, and the real samples solution was concentrated to about 0.5 mL, which was sequentially adjusted to 1.0 mL. Moreover, to obtain the required MC-RR spiked samples (1 ~ 100 ng L<sup>-1</sup>), the corresponding standard concentration of MC-RR (0.1 ~ 100 ng L<sup>-1</sup>) was added to the extracted real sample solution, and centrifuged at 4000 rpm for 10 minutes. The extracted buffer samples solution was used for MC-RR detection of the proposed aptasensor.

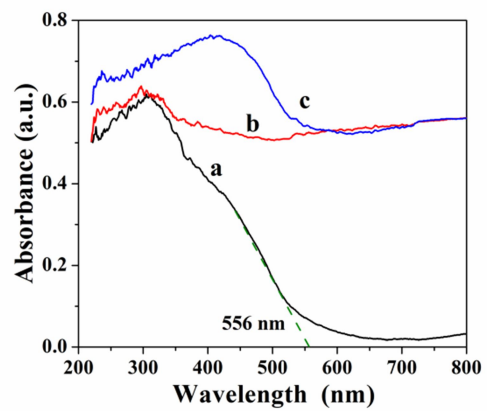

**Fig. S1.** The UV–Vis diffuse-reflectance spectra of  $\text{ZnIn}_2\text{S}_4$  (curve a),  $\text{Ti}_3\text{C}_2$  (curve b), and  $\text{Ti}_3\text{C}_2/\text{ZnIn}_2\text{S}_4$  (curve c).

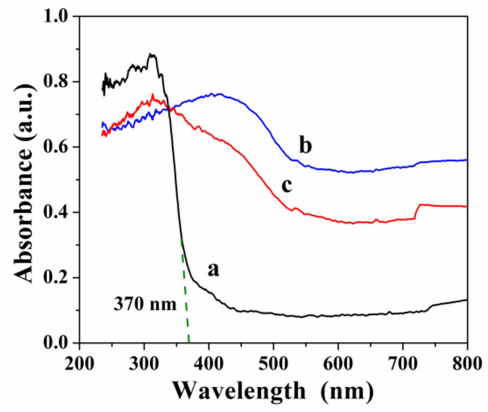

**Fig. S2.** The UV–Vis diffuse-reflectance spectra of apt (curve a),  $\text{Ti}_3\text{C}_2/\text{ZnIn}_2\text{S}_4$  (curve b), and apt/ $\text{Ti}_3\text{C}_2/\text{ZnIn}_2\text{S}_4$  (curve c).

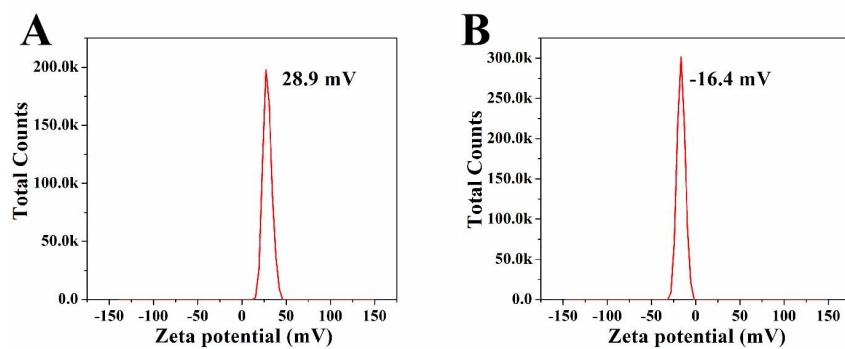

**Fig. S3.** The zeta potential diagram of  $\text{Ti}_3\text{C}_2/\text{ZnIn}_2\text{S}_4$  (A) before and (B) after adding the MC-RR aptamer.

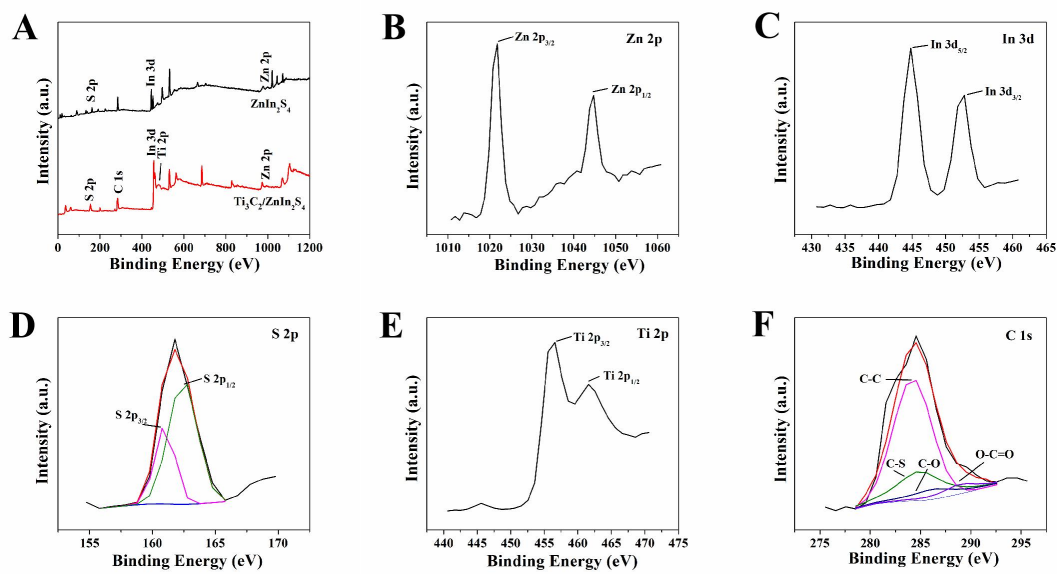

**Fig. S4.** (A) The XPS pattern of ZnIn<sub>2</sub>S<sub>4</sub> and Ti<sub>3</sub>C<sub>2</sub>/ZnIn<sub>2</sub>S<sub>4</sub>, (B) Zn 2p, (C) In 3d, (D) S 2p, (E) Ti 2p, and (F) C 1s.

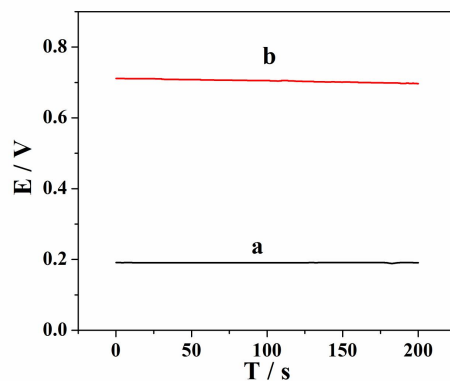

**Fig. S5.** The OCP curve of ZnIn<sub>2</sub>S<sub>4</sub>/FTO photoanode and Cu<sub>2</sub>O/FTO photocathode with (curve a) or without (curve b) photoirradiation in 0.1M PBS (6.0).

The OCP value of the proposed aptasensor is  $\approx 0.71$  V under the photoirradiation condition, which is much higher than the OCP value of 0.18 V in the dark environment, suggesting that excitation light source plays an crucial role in the whole sensing platform. The explanation of the result is that the excitation light source drives the separation between electron-hole on the surface of the ZnIn<sub>2</sub>S<sub>4</sub> photoanode, thereby accelerating the migration rate of photoelectrons from the photoanode to the photocathode and improving the photoelectric conversion efficiency.



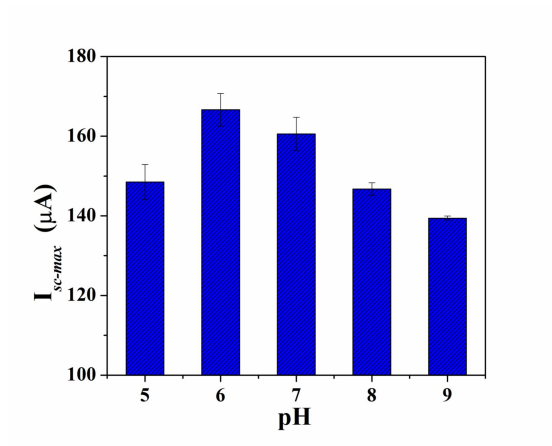

**Fig. S6.** Effect of pH values of PBS.

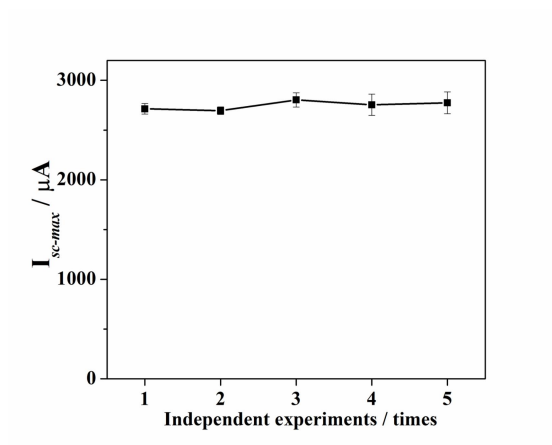

**Fig. S7.** The reproducibility of the developed aptasensor toward MC-RR at 1 pM concentration.

**Table S1** Comparison of the proposed self-powered aptasensor for the detection of MC-RR with other methods.

| Methods                            | Linear range (mol/L)                           | LOD (mol/L)           | Reference |
|------------------------------------|------------------------------------------------|-----------------------|-----------|
| Multi-immunogen                    | $1.7 \times 10^{-7} \sim 2.7 \times 10^{-6}$   | $8.0 \times 10^{-8}$  | [4]       |
| CL <sup>a</sup> aptasensor         | $1.0 \times 10^{-10} \sim 7.0 \times 10^{-8}$  | $3.3 \times 10^{-11}$ | [5]       |
| Fluorometric                       | $2.0 \times 10^{-7} \sim 2.5 \times 10^{-6}$   | $8.0 \times 10^{-8}$  | [2]       |
| FMIP <sup>b</sup> Mn doped ZnS QDs | $2.5 \times 10^{-9} \sim 1.8 \times 10^{-8}$   | $6.0 \times 10^{-13}$ | [6]       |
| Au@label@Ag@Au NPs                 | $1.0 \times 10^{-11} \sim 1.0 \times 10^{-9}$  | $1.3 \times 10^{-12}$ | [7]       |
| Self-powered aptasensor            | $1.0 \times 10^{-13} \sim 1.0 \times 10^{-10}$ | $3.3 \times 10^{-14}$ | This work |

a—Chemiluminescence

b—Fragment-dummy-template molecularly imprinted polymers

## References

1. X.J. Du, W.H. Du, J. Sun and D. Jiang, *Food Chem.*, 2022, **385**, 132731.
2. S.J. Wu, Q. Li, N. Duan, H.L. Ma and Z.P. Wang, *Microchim. Acta*, 2016, **183**, 2555–2562.
3. C.Z. Zhang, P.C. Chen, L.Y. Zhou and J.Y. Peng, *Food Chem.*, 2022, **366**, 130490.
4. J.C. Liu, Y.H. Yang, Q. Zhu, Z.H. Wang, G.J. Hu, H.C. Shi and X.H. Zhou, *Environ. Sci. Technol.*, 2021, **55**, 12984–12993.
5. B.R. Liu, X.H. Li, S.M. Liu and X. Hun, *Microchem. J.*, 2019, **145**, 648–654.
6. Y.Y. Li, J.Q. You, Y. He, Y.L. Ge, G.W. Song and J.G. Zhou, *ChemistrySelect.*, 2020, **5**, 12028–12033.
7. X.J. Lou, X.J. Zhao, G.Q. Wallace, M.H. Brunet, K.J. Wilkinson, P. Wu, C.X. Cai, C.G. Bazuin and J.F. Masson, *ACS Appl. Mater. Interfaces.*, 2021, **13**, 6545–6556.
